# Supplementary material for: 2D/2D Bi2WO6/Protonated g-C3N4 step-scheme heterojunctions for enhancing the photodegradation of 17β-estradiol: promotional role of electrostatic interaction
Source: Royal Society of Chemistry journal article supplement (doi:10.1039/d1nj05334e), 2022-01-01
Supplement: d1nj05334e1.pdf [file d1nj05334e1.pdf]

**2D/2D Bi<sub>2</sub>WO<sub>6</sub>/Protonated g-C<sub>3</sub>N<sub>4</sub> Direct Z-scheme Heterojunctions for  
Enhancing Photodegradation of 17β-Estradiol: Promotional Role of Electrostatic  
Interaction**

Yashi Qing<sup>a,b</sup>, Yanxiang Li<sup>a,b,\*</sup>, Dan Hu<sup>d</sup>, Zhiwei Guo<sup>a</sup>, Yujie Yang<sup>a,b</sup>, Lihong Geng<sup>c</sup>,  
Wangliang Li<sup>a,b,\*</sup>

*<sup>a</sup>CAS Key Laboratory of Green Process and Engineering, Institute of Process  
Engineering, Chinese Academy of Sciences, Beijing 100190, China*

*<sup>b</sup>University of Chinese Academy of Sciences, Beijing 100049, China*

*<sup>c</sup>Key Laboratory of Polymer Materials and Products of Universities in Fujian, Fujian  
University of Technology, Fujian 350108, China*

*<sup>d</sup>Key Laboratory of Cleaner Production and Integrated Resource Utilization of China  
National Light Industry, Beijing Technology and Business University, Beijing 100048,  
China*

\*Corresponding Author: Wangliang Li, +86-10-82545011, [wlli@ipe.ac.cn](mailto:wlli@ipe.ac.cn); Yanxiang  
Li, [yxli@ipe.ac.cn](mailto:yxli@ipe.ac.cn)

Number of tables: 3

Number of figures: 3

Table S1. The information of the intermediates.

| Compounds             | Formula                                        | m/z    | Proposed structure                                                                   |
|-----------------------|------------------------------------------------|--------|--------------------------------------------------------------------------------------|
| 17 $\beta$ -Estradiol | C <sub>18</sub> H <sub>24</sub> O <sub>2</sub> | 273.13 | 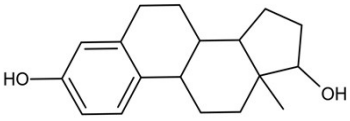   |
| P1                    | C <sub>18</sub> H <sub>22</sub> O <sub>2</sub> | 270.72 |    |
| P2                    | C <sub>18</sub> H <sub>22</sub> O <sub>3</sub> | 287.19 |    |
| P3                    | C <sub>18</sub> H <sub>22</sub> O <sub>3</sub> | 287.19 |    |
| P4                    | C <sub>18</sub> H <sub>22</sub> O <sub>3</sub> | 287.19 |   |
| P5                    | C <sub>18</sub> H <sub>20</sub> O <sub>3</sub> | 284.84 |  |
| P6                    | C <sub>18</sub> H <sub>20</sub> O <sub>3</sub> | 284.84 |  |
| P7                    | C <sub>18</sub> H <sub>20</sub> O <sub>3</sub> | 284.84 |  |
| P8                    | C <sub>17</sub> H <sub>24</sub> O              | 245.32 |  |
| P9                    | C <sub>16</sub> H <sub>20</sub> O <sub>2</sub> | 245.32 |  |

---

**P10**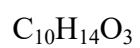

183.15

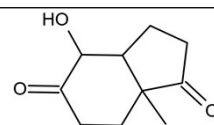**P11**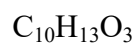

183.15

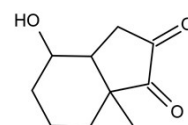**P12**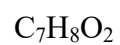

125.94

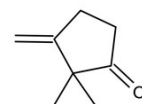**P13**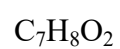

125.94

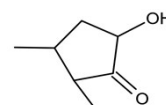**P14**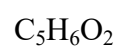

99.20

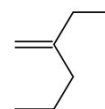**P15**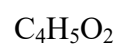

85.21

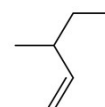

Table S2. Fitted parameters from time-resolved PL spectroscopy of pure  $\text{Bi}_2\text{WO}_6$ , pure  $\text{pg-C}_3\text{N}_4$  and the BPG heterojunction.

| <b>Photocatalysts</b>                       | $\tau_1/\text{ns}$ | $\tau_2/\text{ns}$ | $A_1$  | $A_2$  | $Y_0$ | $\tau/\text{ns}$ | $R^2$   |
|---------------------------------------------|--------------------|--------------------|--------|--------|-------|------------------|---------|
| <b><math>\text{Bi}_2\text{WO}_6</math></b>  | 2.29               | 9.10               | 735.48 | 247.06 | 10.81 | 6.19             | 0.99607 |
| <b><math>\text{pg-C}_3\text{N}_4</math></b> | 2.18               | 7.70               | 708.14 | 266.50 | 9.10  | 5.33             | 0.99682 |
| <b>B1PG1</b>                                | 3.18               | 13.76              | 679.09 | 302.17 | 15.96 | 5.93             | 0.99584 |

Table S3. Bandgap energy ( $E_g$ ), XPS valence band cutoff, Fermi level ( $E_f$ ), valence band ( $E_{VB}$ ) and conduction band ( $E_{CB}$ ) of  $\text{Bi}_2\text{WO}_6$  and  $\text{pg-C}_3\text{N}_4$ .

| Sample                    | $E_g$ (eV) | $E_F - E_V$ (eV) | $E_F$ (eV) | $E_V$ (eV) | $E_C$ (eV) |
|---------------------------|------------|------------------|------------|------------|------------|
| $\text{Bi}_2\text{WO}_6$  | 2.68       | 1.20             | -5.90      | -7.10      | -4.42      |
| $\text{pg-C}_3\text{N}_4$ | 2.65       | 1.05             | -4.18      | -5.23      | -2.59      |

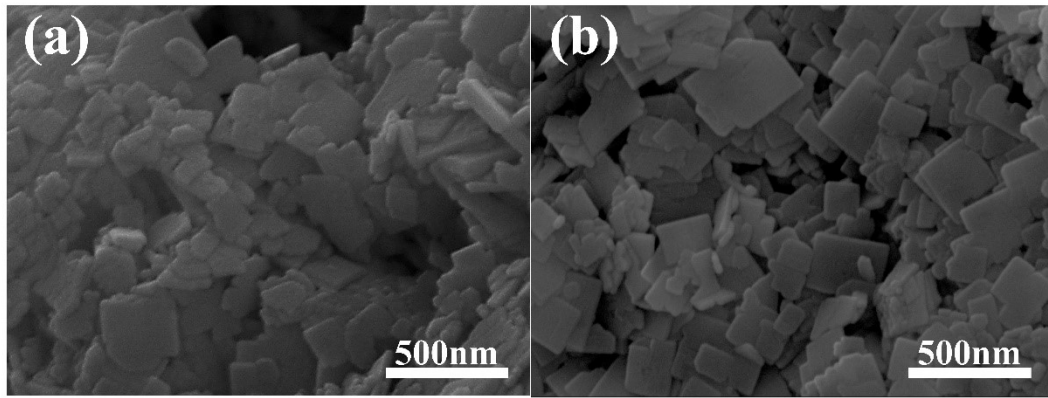

Figure S1. SEM images of (a) B1PG2; (b) B2PG1.

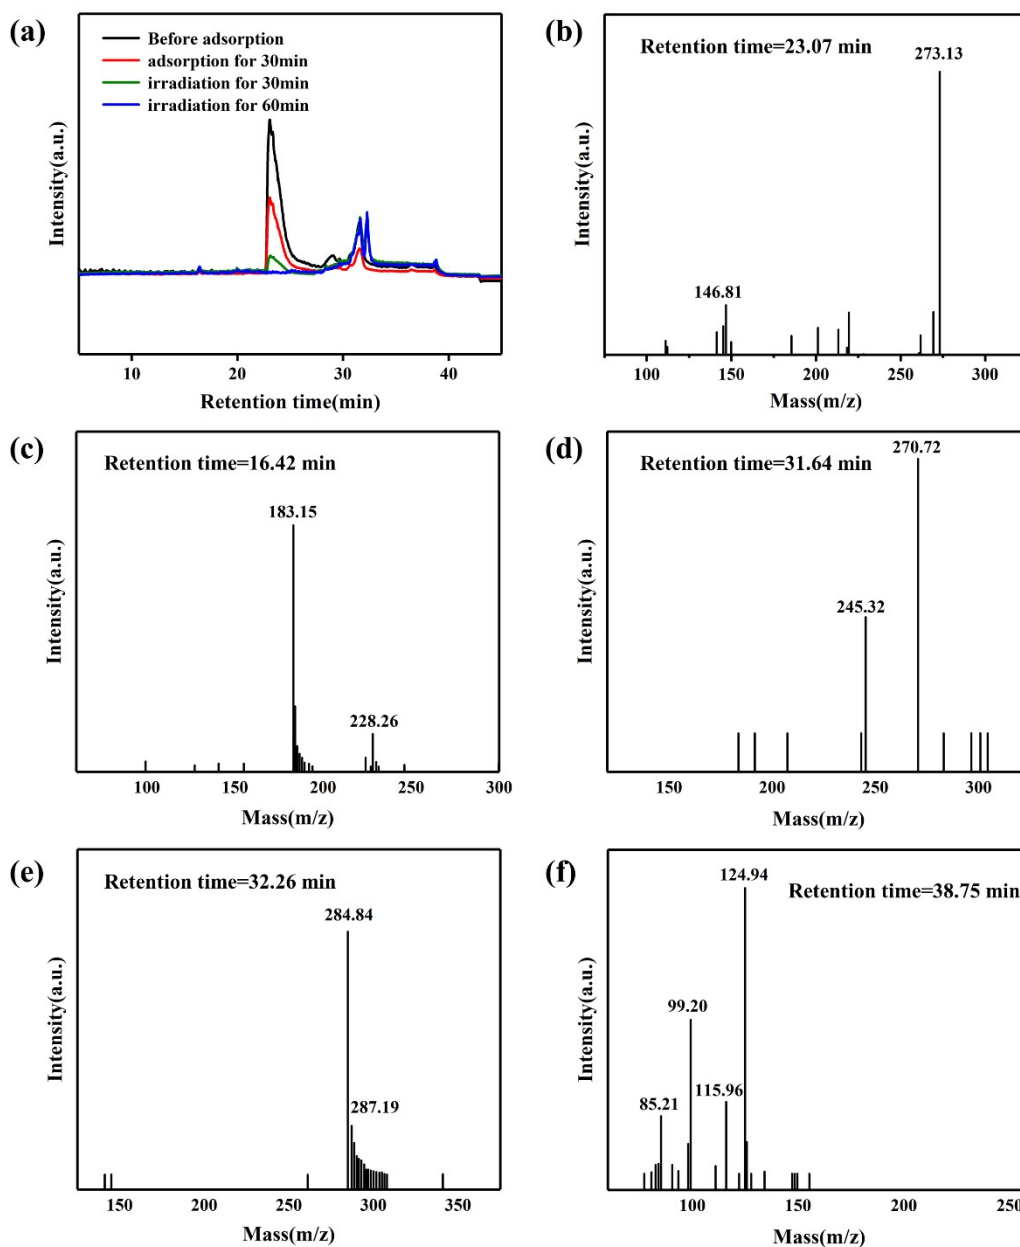

Figure S2. (a) Total ion current (TIC) chromatograms of the reaction solutions before and after irradiation. (b) 17  $\beta$ -estradiol and (c)~(f) its photodegradation intermediates.

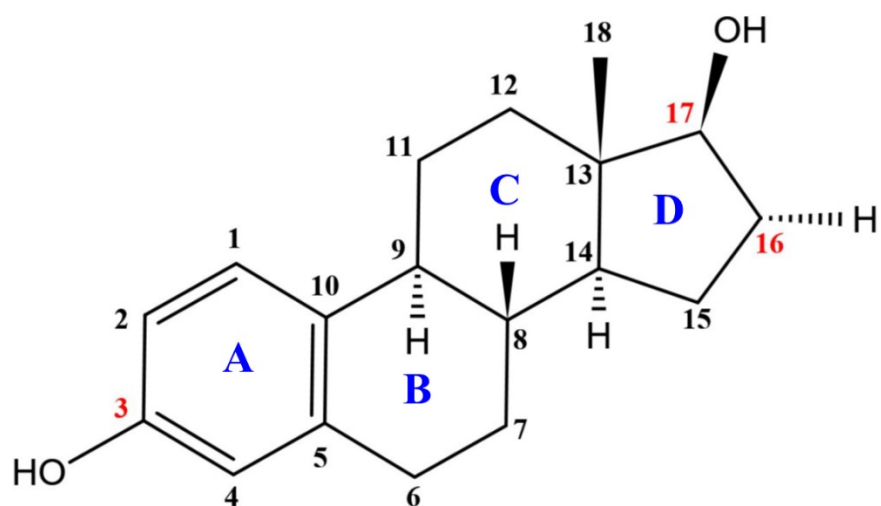

Figure S3. Molecular structure of E2.
